# Supplementary material for: Invasive and non-invasive diagnostic approaches for microbiological diagnosis of hospital-acquired pneumonia
Source: Springer Nature journal article supplement (doi:10.1186/s13054-019-2348-2), 2019-02-18
Supplement: MOESM1 [file 16488906]

**Table S1. Methods for diagnostic approach**

|                                                                      | Entire cohort<br>(n=200) | Never received<br>invasive MV<br>after ICUAP<br>(n=78) | Received<br>invasive MV<br>after ICUAP<br>(n=122) | P value |
|----------------------------------------------------------------------|--------------------------|--------------------------------------------------------|---------------------------------------------------|---------|
| <b>Respiratory tract assessment</b>                                  |                          |                                                        |                                                   |         |
| Sputum sampling done                                                 | 67 (34%)                 | 38 (49%)                                               | 29 (24%)                                          | <0.001  |
| Sputum culture positive                                              | 23 (12%)                 | 11 (14%)                                               | 12 (10%)                                          | 0.36    |
| Sputum culture positive among those with sputum culture done         | 23/67 (34%)              | 11/38 (29%)                                            | 12/29 (41%)                                       | 0.29    |
| EAT sampling done                                                    | 63 (32%)                 | -                                                      | 63 (52%)                                          |         |
| EAT culture positive                                                 | 27 (14%)                 | -                                                      | 27 (22%)                                          |         |
| EAT culture positive among those with EAT culture done               | 27/63 (43%)              | -                                                      | 27/63 (43%)                                       |         |
| FBAS sampling done                                                   | 93 (47%)                 | 39 (50%)                                               | 54 (44%)                                          | 0.43    |
| FBAS culture positive                                                | 46 (23%)                 | 15 (19%)                                               | 31 (25%)                                          | 0.31    |
| FBAS culture positive among those with FBAS culture done             | 46/93 (50%)              | 15/39 (39%)                                            | 31/54 (57%)                                       | 0.071   |
| BAL sampling done                                                    | 59 (30%)                 | 11 (14%)                                               | 48 (39%)                                          | <0.001  |
| BAL culture positive                                                 | 18 (9%)                  | 2 (3%)                                                 | 16 (13%)                                          | 0.011   |
| BAL culture positive among those with BAL culture done               | 18/59 (31%)              | 2/11 (18%)                                             | 16/48 (33%)                                       | 0.48    |
| Pleural liquid sampling done                                         | 36 (18%)                 | 7 (9%)                                                 | 29 (24%)                                          | 0.008   |
| Pleural liquid positive                                              | 6 (3%)                   | -                                                      | 6 (5%)                                            | 0.083   |
| Pleural liquid positive among those with liquid pleural done         | 6/36 (17%)               | -                                                      | 6/29 (21%)                                        | 0.32    |
| Urinary antigen                                                      |                          |                                                        |                                                   |         |
| Urinary antigen investigation*                                       | 95 (48%)                 | 38 (49%)                                               | 57 (47%)                                          | 0.78    |
| Positive urinary antigen                                             | 5 (3%)                   | 3 (4%)                                                 | 2 (2%)                                            | 0.38    |
| Positive urinary antigen among those with urinary investigation done | 5/95 (5%)                | 3/38 (8%)                                              | 2/57 (4%)                                         | 0.39    |
| Blood culture                                                        |                          |                                                        |                                                   |         |
| Blood culture done                                                   | 157 (79%)                | 58 (74%)                                               | 99 (81%)                                          | 0.25    |
| Positive blood culture                                               | 14 (7%)                  | 4 (5%)                                                 | 10 (8%)                                           | 0.41    |
| Positive blood culture among those with blood culture done           | 14/157 (9%)              | 4/58 (7%)                                              | 10/99 (10%)                                       | 0.50    |

\* S. pneumoniae and Legionella
