# Supplementary material for: Invasive and non-invasive diagnostic approaches for microbiological diagnosis of hospital-acquired pneumonia
Source: Springer Nature journal article supplement (doi:10.1186/s13054-019-2348-2), 2019-02-18
Supplement: MOESM2 [file 16488906]

**Table S2. Comparison between patients who did invasive sampling while receiving or not receiving invasive mechanical ventilation**

|                                               | Not fiberoptic-bronchoscopy* |                     | Fiberoptic-bronchoscopy* |                     | P value |
|-----------------------------------------------|------------------------------|---------------------|--------------------------|---------------------|---------|
|                                               | Not Required iMV (n=35)      | Required iMV (n=87) | Not Required iMV (n=43)  | Required iMV (n=35) |         |
| Age, years, mean SD                           | 66 ± 13                      | 66 ± 12             | 66 ± 14                  | 67 ± 11             | 0.99    |
| APACHE II Score at HAP diagnosis, mean SD     | 15.2 ± 4                     | 17.7 ± 6            | 13.3 ± 4                 | 17.5 ± 5            | <0.001  |
| SOFA Score at HAP diagnosis, median [p25-p75] | 5 [4-7]                      | 7 [5-10]            | 5 [4-8]                  | 6 [4-8]             | <0.001  |
| PaO <sub>2</sub> /FiO <sub>2</sub> , mean SD  | 192 ± 93                     | 169 ± 71            | 209 ± 86                 | 151 ± 63            | 0.006   |
| Bilateral infiltrates, n (%)                  | 9 (26%)                      | 36 (41%)            | 6 (14%)                  | 15 (43%)            | 0.007   |
| Multilobar infiltrates, n (%)                 | 16 (46%)                     | 51 (59%)            | 22 (51%)                 | 20 (57%)            | 0.58    |
| ARDS at pneumonia diagnosis, n (%)            | 2 (6%)                       | 17 (20%)            | 0 (0%)                   | 8 (24%)             | 0.003   |
| <b>Respiratory support</b>                    |                              |                     |                          |                     |         |
| NIV previous of HAP diagnosis                 | 4 (11%)                      | 17 (20%)            | 14 (33%)                 | 11 (31%)            | 0.077   |
| NIV to provide support upon HAP diagnosis     | 9 (26%)                      | 23 (26%)            | 10 (23%)                 | 12 (34%)            | 0.73    |
| Need of invasive mechanical ventilation       |                              |                     |                          |                     | <0.001  |
| Within <24h                                   |                              | 60 (69%)            |                          | 12 (34%)            |         |
| Within 24-72h                                 |                              | 17 (20%)            |                          | 13 (37%)            |         |
| Within >72h                                   |                              | 10 (11%)            |                          | 20 (29%)            |         |
| Time to intubation, days                      |                              |                     |                          |                     | 0.001   |
| Mean SD                                       |                              | 0.91 (2)            |                          | 1.57 (2)            |         |
| Median [p25-p75]                              |                              | 0 [0-1]             |                          | 1 [0-3]             |         |
| <b>Definitive causative pathogen</b>          | 12 (34%)                     | 47 (54%)            | 19 (44%)                 | 21 (60%)            | 0.112   |

ARDS: Acute respiratory distress syndrome, APACHE II: Acute Physiology and Chronic Health Evaluation, FBS: fiberoptic-bronchoscopy, HAP: hospital-acquired pneumonia, iMV: invasive mechanical ventilation, NIV: non-invasive ventilation, SOFA score: Sequential Organ Failure Assessment.

\* In this table, only considered the invasive approaches (fiberoptic-bronchoscopy) performed before invasive mechanical ventilation in those patients who were subsequently intubated.
